# Supplementary material for: Conversion of polystyrene into porous carbon sheets and hollow carbon shells over different magnesium oxide templates for efficient removal of methylene blue
Source: Royal Society of Chemistry journal article supplement (doi:10.1039/c5ra18505j), 2015-01-01
Supplement: c5ra18505j1.pdf [file c5ra18505j1.pdf]

## Supporting Information

### Conversion of Polystyrene into Porous Carbon Sheet and Hollow Carbon Shell over Different Magnesium Oxide Templates for Efficient Removal of Methylene Blue

Yanliang Wen<sup>a,b</sup>, Jie Liu,<sup>a,b</sup> Jiangfeng Song,<sup>\*a</sup> Jiang Gong,<sup>b</sup> Hao Chen<sup>b</sup> and Tao Tang<sup>\*b</sup>

**Table S1** Yields of the different fractions for the pyrolysis of PS/sheet MgO at 500, 600, 700 and 800 °C.

| Temperature (°C) | 500  | 600  | 700  | 800  |
|------------------|------|------|------|------|
| Carbon (wt%)     | 0.3  | 1.0  | 12.2 | 15.0 |
| Liquid (wt%)     | 99.7 | 98.7 | 87.1 | 84.5 |
| Gas (wt%)        | 0.1  | 0.2  | 0.4  | 0.4  |

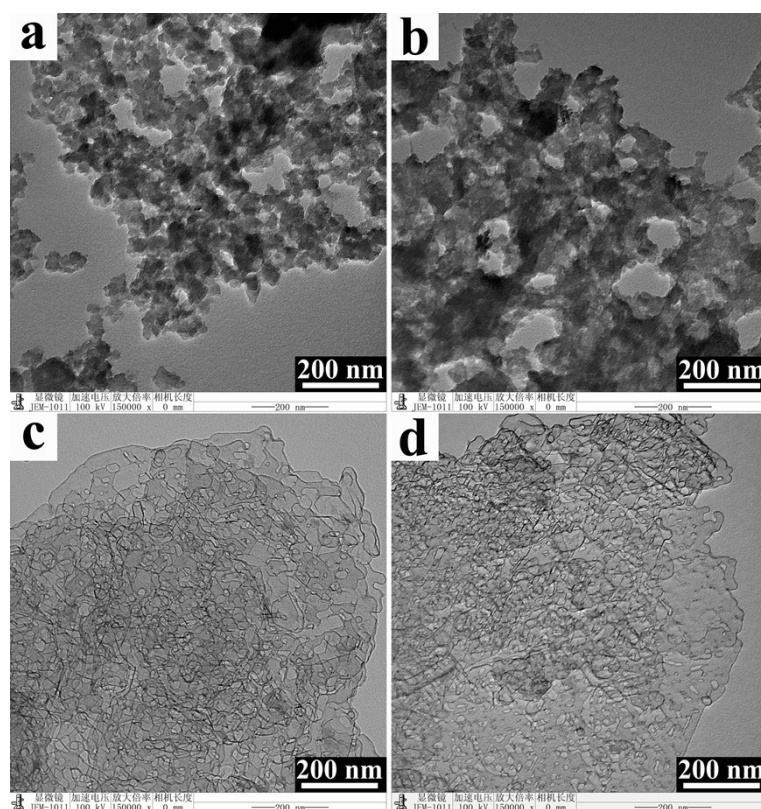

**Fig. S1** TEM images of nanocarbon obtained on sheet MgO at (a) 500 °C, (b) 600 °C, (c) 700 °C, (d) 800 °C.

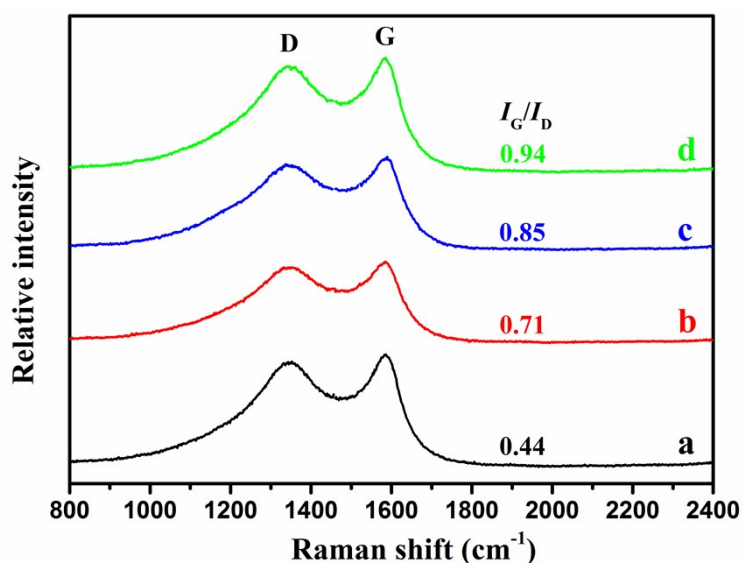

**Fig. S2** Raman spectra of carbon obtained on sheet MgO at (a) 500 °C, (b) 600 °C, (c) 700 °C, (d) 800 °C.

**Table S2.** Assignment and area percentage of the compounds in Fig. 10 that were produced by decomposition of PS and the mixture of PS/MgO at 700 °C.

| Entry | Elution time (min) | Substance                                                                                                     | PS   | PS-Sheet MgO two-stage <sup>a</sup> | PS-Polygonal MgO two-stage <sup>a</sup> | PS-Sheet MgO one-pot <sup>b</sup> | PS-Polygonal MgO one-pot <sup>b</sup> |
|-------|--------------------|---------------------------------------------------------------------------------------------------------------|------|-------------------------------------|-----------------------------------------|-----------------------------------|---------------------------------------|
| 1     | 1.627              | Benzene                    | 0.1  | 0.2                                 | 0.1                                     | 0.3                               | 0.6                                   |
| 2     | 2.261              | Toluene                    | 2.7  | 3.8                                 | 4.6                                     | 5.2                               | 8.0                                   |
| 3     | 3.483              | Ethylbenzene               | 1.4  | 0.9                                 | 0.8                                     | 6.7                               | 5.5                                   |
| 4     | 4.050              | Styrene                    | 27.2 | 42.6                                | 51.1                                    | 36.2                              | 50.2                                  |
| 5     | 4.991              | (E)-prop-1-en-1-ylbenzene  | 0.1  | 0.1                                 | 0.4                                     | 0.1                               | 0.1                                   |
| 6     | 5.139              | Propylbenzene              | 0    | 0                                   | 0                                       | 0.6                               | 0                                     |
| 7     | 5.598              | Prop-1-en-2-ylbenzene      | 3.0  | 2.3                                 | 2.8                                     | 2.1                               | 6.9                                   |
| 8     | 6.485              | Allylbenzene               | 0.1  | 0.3                                 | 0.2                                     | 0.7                               | 0.4                                   |
| 9     | 6.727              | 1H-indene                  | 0.4  | 0.2                                 | 0.3                                     | 0                                 | 0.5                                   |

|    |        |                                            |                                                                                     |      |      |      |     |     |
|----|--------|--------------------------------------------|-------------------------------------------------------------------------------------|------|------|------|-----|-----|
| 10 | 12.571 | Diphenylmethane                            | 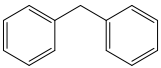   | 0.4  | 0.1  | 0.1  | 0.2 | 0.3 |
| 11 | 13.606 | 1,2-diphenylethane                         |    | 5.2  | 2.3  | 2.6  | 0.8 | 2.2 |
| 12 | 14.009 | Propane-1,2-<br>diylidibenzene             |    | 2.2  | 1.2  | 1.4  | 0.7 | 1.2 |
| 13 | 15.166 | 1,3-diphenylpropane                        |    | 2.1  | 1.2  | 1.1  | 1.0 | 0.5 |
| 14 | 15.489 | (E)-but-1-ene-1,3-<br>diylidibenzene       |    | 0.6  | 1.1  | 0    | 5.3 | 0.6 |
| 15 | 15.813 | (E)-1,2-diphenylethene                     |  | 2.5  | 0.6  | 0.3  | 0.4 | 0.6 |
| 16 | 15.948 | 2-phenyl-1,2,3,4-<br>tetrahydronaphthalene |  | 15.9 | 12.6 | 13.5 | 3.7 | 7.5 |
| 17 | 16.033 | 1-methyl-9,10-<br>dihydrophenanthrene      |  | 3.2  | 2.2  | 1.8  | 1.6 | 1.7 |
| 18 | 16.402 | 1-phenyl-1,2,3,4-<br>tetrahydronaphthalene |  | 0.8  | 0.3  | 0.3  | 0.6 | 0.4 |
| 19 | 16.550 | (2-methylprop-1-ene-1,1-                   |                                                                                     | 0    | 0.9  | 0    | 4.8 | 0.7 |

|    |        |  |                                                                                     |     |     |     |     |     |  |
|----|--------|--|-------------------------------------------------------------------------------------|-----|-----|-----|-----|-----|--|
|    |        |  | 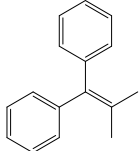   |     |     |     |     |     |  |
|    |        |  | diyl)dibenzene                                                                      |     |     |     |     |     |  |
|    |        |  | (Z)-penta-1,3-diene-1,1-                                                            |     |     |     |     |     |  |
| 20 | 16.613 |  |    | 2.1 | 0.9 | 0.8 | 0   | 0.4 |  |
|    |        |  | diyl)dibenzene                                                                      |     |     |     |     |     |  |
|    |        |  | (E)-but-2-ene-2,3-                                                                  |     |     |     |     |     |  |
| 21 | 16.753 |  |    | 0   | 1.1 | 0   | 5.0 | 1.1 |  |
|    |        |  | diyl)dibenzene                                                                      |     |     |     |     |     |  |
|    |        |  | (Z)-but-1-ene-1,4-                                                                  |     |     |     |     |     |  |
| 22 | 16.971 |  |   | 0.9 | 0.8 | 0.6 | 0.5 | 0   |  |
|    |        |  | diyl)dibenzene                                                                      |     |     |     |     |     |  |
|    |        |  | 1-phenylnaphthalene                                                                 |     |     |     |     |     |  |
| 23 | 17.313 |  |  | 0.8 | 0.6 | 0.3 | 1.0 | 0.7 |  |
|    |        |  | 1-methyl-4-((1E,3E)-4-phenylbuta-                                                   |     |     |     |     |     |  |
|    |        |  | 1,3-dien-                                                                           |     |     |     |     |     |  |
| 24 | 17.518 |  |  | 0.4 | 0.5 | 0.3 | 0   | 0   |  |
|    |        |  | 1-yl)benzene                                                                        |     |     |     |     |     |  |
|    |        |  | 1,1':2',1''-terphenyl                                                               |     |     |     |     |     |  |
| 25 | 17.605 |  |  | 0.3 | 0   | 0   | 0   | 0.2 |  |
|    |        |  | hexa-1,5-diene-2,5-                                                                 |     |     |     |     |     |  |
|    |        |  | diyl)dibenzene                                                                      |     |     |     |     |     |  |
| 26 | 17.712 |  |  | 2.7 | 1.8 | 1.8 | 0   | 1.0 |  |

|    |        |                                                                                     |     |     |     |     |     |  |
|----|--------|-------------------------------------------------------------------------------------|-----|-----|-----|-----|-----|--|
|    |        | (E)-pent-1-ene-1,5-                                                                 |     |     |     |     |     |  |
| 27 | 18.043 | diylidibenzene                                                                      | 0.8 | 0.7 | 0.3 | 0.5 | 0.4 |  |
|    |        | 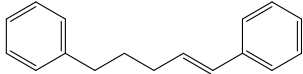   |     |     |     |     |     |  |
|    |        | (Z)-1,4(1,4)-                                                                       |     |     |     |     |     |  |
| 28 | 18.390 | dibenzenacycloheptaphan-2-ene                                                       | 1.4 | 0.7 | 0.7 | 0   | 0.3 |  |
|    |        |    |     |     |     |     |     |  |
|    |        | 2-phenylnaphthalene                                                                 |     |     |     |     |     |  |
| 29 | 18.482 |    | 1.8 | 0.7 | 0.2 | 6.9 | 1.7 |  |
|    |        | Pent-3-yne-2,2-                                                                     |     |     |     |     |     |  |
| 30 | 18.588 | diylidibenzene                                                                      | 2.7 | 1.5 | 1.3 | 1.4 | 1.3 |  |
|    |        |   |     |     |     |     |     |  |
|    |        | (E)-hexa-1,5-diene-1,5-                                                             |     |     |     |     |     |  |
| 31 | 18.875 | diylidibenzene                                                                      | 0.7 | 0.4 | 0.3 | 0   | 0   |  |
|    |        |  |     |     |     |     |     |  |
|    |        | Ethane-1,1,2-                                                                       |     |     |     |     |     |  |
|    |        | triytribenzene                                                                      |     |     |     |     |     |  |
| 32 | 19.651 |  | 0.1 | 0.2 | 0.1 | 0   | 0   |  |
|    |        | 1-benzyl-naphthalene                                                                |     |     |     |     |     |  |
| 33 | 19.739 |  | 0.1 | 0.5 | 0   | 6.6 | 0.4 |  |
|    |        | 2-benzyl-naphthalene                                                                |     |     |     |     |     |  |
| 34 | 19.993 |  | 0.9 | 0.2 | 0   | 0   | 0   |  |

|    |        |                                                                                                                                                       |      |      |     |     |     |
|----|--------|-------------------------------------------------------------------------------------------------------------------------------------------------------|------|------|-----|-----|-----|
| 35 | 20.108 | 1,1':4',1''-terphenyl<br>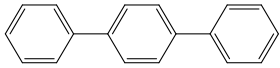                                            | 0.6  | 0    | 0   | 0.3 | 0.3 |
| 36 | 21.298 | 1-ethyl-2-(1-phenylethyl)benzene<br>                                 | 0.3  | 0.3  | 0.3 | 0.1 | 0   |
| 37 | 21.482 | Butane-1,2,3,4-tetrayltetrabenzene<br>                               | 0.2  | 0.2  | 0.1 | 0   | 0   |
| 38 | 22.017 | (3-(cyclopent-2-en-1-yl)-2-methylprop-1-ene-1,1-diyl)dibenzene<br> | 0    | 0.4  | 0   | 0.8 | 0.2 |
| 39 | 22.195 | (E)-1,2-di-o-tolylolethene<br>                                     | 0.2  | 0.5  | 0   | 0.8 | 0   |
| 40 | 22.584 | (Z)-but-2-ene-2,3-diyl-dibenzene<br>                               | 12.3 | 11.5 | 9.5 | 2.3 | 3.3 |
| 41 | 22.775 | (2-methylprop-2-ene-1,1-diyl)dibenzene<br>                         | 0    | 0.3  | 0   | 0.6 | 0   |

|    |        |                                                                                     |     |     |     |     |     |   |
|----|--------|-------------------------------------------------------------------------------------|-----|-----|-----|-----|-----|---|
|    |        | Buta-1,3-diene-1,1-                                                                 |     |     |     |     |     |   |
| 42 | 23.109 | 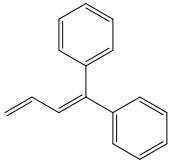   | 0   | 0.2 | 0   | 0   | 0   | 0 |
|    |        | diylidibenzene                                                                      |     |     |     |     |     |   |
|    |        | 3-phenyl-1,2-                                                                       |     |     |     |     |     |   |
|    |        | dihydronaphthalene                                                                  |     |     |     |     |     |   |
| 43 | 23.258 |    | 0.2 | 0.3 | 0.2 | 0   | 0   | 0 |
|    |        | 6-benzyl-1,2,3,4-                                                                   |     |     |     |     |     |   |
|    |        | tetrahydronaphthalene                                                               |     |     |     |     |     |   |
| 44 | 23.381 |    | 0.3 | 0.2 | 0.3 | 0   | 0   | 0 |
|    |        | But-1-ene-1,1-                                                                      |     |     |     |     |     |   |
| 45 | 23.433 |   | 0   | 0.7 | 0   | 1.2 | 0.4 | 0 |
|    |        | diylidibenzene                                                                      |     |     |     |     |     |   |
|    |        | (E)-hex-2-ene-2,5-                                                                  |     |     |     |     |     |   |
|    |        | diylidibenzene                                                                      |     |     |     |     |     |   |
| 46 | 23.555 |  | 0.2 | 0.2 | 0.1 | 0   | 0   | 0 |
|    |        | 1,1,3-trimethyl-3-phenyl-2,3-                                                       |     |     |     |     |     |   |
|    |        | dihydro-1H-indene                                                                   |     |     |     |     |     |   |
| 47 | 23.624 |  | 0.2 | 0.2 | 0.1 | 0   | 0   | 0 |
|    |        | (E)-1,4-diphenylbut-                                                                |     |     |     |     |     |   |
|    |        | 2-ene                                                                               |     |     |     |     |     |   |
| 48 | 23.844 |  | 0.3 | 0.2 | 0.2 | 0   | 0   | 0 |
| 49 | 24.364 | 4'-phenyl-1,1':2',1''-                                                              | 0   | 0   | 0   | 0.4 | 0   | 0 |
